# Supplementary material
Source: publisher figshare collection journal article supplement (https://gsapubs.figshare.com/ndownloader/files/31907912)
Supplement: Supplementary file 1 [file 31907912]

## Sheet: data
Location/Basin	Age	Strat Unit/ description	Climate setting	Clinoform number?	Flooded topset width (km)	Total topset width (km)	Normalised flooded topset width (km)		Age start (Ma)	Age end (Ma)	Mean age (Ma)
Gulf Of Mexico	Paleocene	Lower Wilcox	Greenhouse	6	20.6842	190	0.108864	3	65.5	55.8	60.65		n total	80
			Greenhouse	7	16.8764	195	0.0865456	3	65.5	55.8	60.65		n greenhouse	45
			Greenhouse	8	19.5818	200	0.097909	3	65.5	55.8	60.65		n transitional	24
			Greenhouse	9	23.4918	205	0.114594	3	65.5	55.8	60.65		n icehouse	11
			Greenhouse	10	24.6124	210	0.117202	3	65.5	55.8	60.65
			Greenhouse	11	24.8566	215	0.115612	3	65.5	55.8	60.65		Min total topset width	4
			Greenhouse	12	28.9809	220	0.131731	3	65.5	55.8	60.65		Max total topset width	250
			Greenhouse	13	26.7562	225	0.118916	3	65.5	55.8	60.65		Min flooded topset width	2
			Greenhouse	14	29.892	230	0.129965	3	65.5	55.8	60.65		Max flooded topset width	150
			Greenhouse	15	29.892	235	0.1272	3	65.5	55.8	60.65		Min norm topset width	0.0865456
Spitsbergen	Eocene	Steep shelf	Greenhouse	1	4.5	25	0.18	3	55.8	33.9	44.85		Max norm topset width	0.944444
			Greenhouse	2	3.5	25.9091	0.135088	3	55.8	33.9	44.85
			Greenhouse	3	3.5	26.8182	0.130508	3	55.8	33.9	44.85
			Greenhouse	4	4.5	27.7273	0.162295	3	55.8	33.9	44.85
			Greenhouse	5	4.2	28.6364	0.146667	3	55.8	33.9	44.85
			Greenhouse	6	4	29.5455	0.135385	3	55.8	33.9	44.85
			Greenhouse	7	3.8	30.4545	0.124776	3	55.8	33.9	44.85
			Greenhouse	8	4.5	31.3636	0.143478	3	55.8	33.9	44.85
			Greenhouse	9	6.3	32.2727	0.195211	3	55.8	33.9	44.85
			Greenhouse	10	10	33.1818	0.30137	3	55.8	33.9	44.85
			Greenhouse	11	5.8	34.0909	0.170133	3	55.8	33.9	44.85
			Greenhouse	12	5	35	0.142857	3	55.8	33.9	44.85
Washakie Basin	Maastrichtian	Seismic line NS4	Greenhouse	4	18	60	0.3	3	70.6	65.5	68.05
			Greenhouse	5	23.5	67.5	0.348148	3	70.6	65.5	68.05
			Greenhouse	6	39.6	75	0.528	3	70.6	65.5	68.05
			Greenhouse	7	47	82.5	0.569697	3	70.6	65.5	68.05
			Greenhouse	8	50.4	90	0.56	3	70.6	65.5	68.05
			Greenhouse	9	52	97.5	0.533333	3	70.6	65.5	68.05
			Greenhouse	10	47	105	0.447619	3	70.6	65.5	68.05
			Greenhouse	11	43.4	112.5	0.385778	3	70.6	65.5	68.05
			Greenhouse	12	47.5	120	0.395833	3	70.6	65.5	68.05
		seismic line NS2	Greenhouse	4	26.6	60	0.443333	3	70.6	65.5	68.05
			Greenhouse	5	32.8	67.5	0.485926	3	70.6	65.5	68.05
			Greenhouse	6	45.1	75	0.601333	3	70.6	65.5	68.05
			Greenhouse	7	53.3	82.5	0.646061	3	70.6	65.5	68.05
			Greenhouse	8	57.5	90	0.638889	3	70.6	65.5	68.05
			Greenhouse	9	47.5	97.5	0.487179	3	70.6	65.5	68.05
			Greenhouse	10	45	105	0.428571	3	70.6	65.5	68.05
El Marcet Catalan Mts	Eocene	Steep shelf	Greenhouse	1	3	4	0.75	3	55.8	33.9	44.85
			Greenhouse	2	2.5	4.66667	0.535714	3	55.8	33.9	44.85
			Greenhouse	3	2.5	5.33333	0.46875	3	55.8	33.9	44.85
			Greenhouse	4	2	6	0.333333	3	55.8	33.9	44.85
			Greenhouse	5	4	6.66667	0.6	3	55.8	33.9	44.85
			Greenhouse	6	4	7.33333	0.545455	3	55.8	33.9	44.85
			Greenhouse	7	5	8	0.625	3	55.8	33.9	44.85
Orinoco Shelf	Pliocene		Transitional	1	100	120	0.833333	2	5.332	1.806	3.569
			Transitional	2	80	125	0.64	2	5.332	1.806	3.569
			Transitional	3	75	130	0.576923	2	5.332	1.806	3.569
			Transitional	4	70	135	0.518519	2	5.332	1.806	3.569
			Transitional	5	80	140	0.571429	2	5.332	1.806	3.569
			Transitional	6	95	145	0.655172	2	5.332	1.806	3.569
			Transitional	7	75	150	0.5	2	5.332	1.806	3.569
			Transitional	8	76	155	0.490323	2	5.332	1.806	3.569
			Transitional	9	70	160	0.4375	2	5.332	1.806	3.569
Zambesi Shelf	Late Miocene to Pleistocene		Transitional	7	60	150	0.4	2	11.608	0.01143	5.80972
			Transitional	6	62	166.667	0.372	2	11.608	0.01143	5.80972
			Transitional	5	65	183.333	0.354545	2	11.608	0.01143	5.80972
			Transitional	4	81	200	0.405	2	11.608	0.01143	5.80972
			Transitional	3	82	216.667	0.378462	2	11.608	0.01143	5.80972
			Transitional	2	96	233.333	0.411429	2	11.608	0.01143	5.80972
			Transitional	1	105	250	0.42	2	11.608	0.01143	5.80972
Gulf Of Mexico	Miocene	???	Transitional	1	68.5	180	0.380556	2	23.03	5.332	14.181
			Transitional	2	63.1	180	0.350556	2	23.03	5.332	14.181
			Transitional	3	61.5	180	0.341667	2	23.03	5.332	14.181
			Transitional	4	65.4	180	0.363333	2	23.03	5.332	14.181
			Transitional	5	61.5	180	0.341667	2	23.03	5.332	14.181
			Transitional	6	48.8	180	0.271111	2	23.03	5.332	14.181
			Transitional	7	49	180	0.272222	2	23.03	5.332	14.181
			Transitional	8	42.6	180	0.236667	2	23.03	5.332	14.181
Bengal Margin	Pleistocene		Icehouse	MIS 2	60	110	0.545455	1	2	0.01	1.005
			Icehouse	MIS 4	100	110	0.909091	1	2	0.01	1.005
			Icehouse	MIS 6	80	110	0.727273	1	2	0.01	1.005
			Icehouse	MIS 8	90	110	0.818182	1	2	0.01	1.005
Mississippi & Lagnappe margins	Pleistocene		Icehouse	L MIS6	120	210	0.571429	1	2	0.01	1.005
			Icehouse	L. MIS4	100	210	0.47619	1	2	0.01	1.005
			Icehouse	L. MIS2	140	210	0.666667	1	2	0.01	1.005
			Icehouse	M. MIS2	150	210	0.714286	1	2	0.01	1.005
Rhone Margin	Pleistocene		Icehouse	MIS6	68	90	0.755556	1	2	0.01	1.005
			Icehouse	MIS4	85	90	0.944444	1	2	0.01	1.005
			Icehouse	MIS2	60	90	0.666667	1	2	0.01	1.005
Diverse locations??	Late Pleistocene		Icehouse	1	75.5			3	0.126	0.01143	0.068715
			Icehouse	2	76			3	0.126	0.01143	0.068715
			Icehouse	3	91			3	0.126	0.01143	0.068715
			Icehouse	4	80			3	0.126	0.01143	0.068715
			Icehouse	5	80.5			3	0.126	0.01143	0.068715
			Icehouse	6	54.5			3	0.126	0.01143	0.068715
			Icehouse	7	24			3	0.126	0.01143	0.068715
			Icehouse	8	25			3	0.126	0.01143	0.068715
			Icehouse	9	35			3	0.126	0.01143	0.068715
			Icehouse	10	40.5			3	0.126	0.01143	0.068715
			Icehouse	11	71			3	0.126	0.01143	0.068715
			Icehouse	12	40.5			3	0.126	0.01143	0.068715
			Icehouse	13	35.5			3	0.126	0.01143	0.068715

## Sheet: G49468
Burgess, P.M., Zhang, J., and Steel, R., 2022, Narrow is normal: Exploring the extent and significance of flooded marine shelves in icehouse, transitional, and greenhouse climate settings: Geology, https://doi.org/10.1130/G49468.1
